# Supplementary material for: Cellulose nanofiber–graphene all solid-state flexible supercapacitors
Source: Royal Society of Chemistry journal article supplement (doi:10.1039/c2ta00386d), 2012-11-15
Supplement: c2ta00386d.pdf [file c2ta00386d.pdf]

## Supporting Information For

### **Cellulose nanofibers/graphene flexible supercapacitors**

#### **Preparation of cellulose nanofibers dispersion**

Cellulose fibers (2 g) was suspended in water (400 ml) containing TEMPO (0.033 g) and sodium bromide (0.33 g). The oxidation reaction was started by adding the desired amount of the NaClO solution (15 mmol/g cellulose). The pH of the reaction solution was maintained to be 10.00 at 25 °C by adding 0.5 M NaOH for 6 h. The oxidized cellulose was thoroughly washed with water by filtration. 2 mg/ml oxidized cellulose/water slurries were sonicated for 15 min at power of 300 W in an ice bath. Cellulose nanofibers dispersion was centrifuged at 10000 g for 10 min to remove the unfibrillated cellulose. The transparent cellulose nanofibers dispersion was stored at 4 °C before used.

#### **Preparation of graphene oxide dispersion**

Graphite powder (6 g) was added into 100 ml beaker containing concentrated H<sub>2</sub>SO<sub>4</sub> (25 ml), K<sub>2</sub>S<sub>2</sub>O<sub>8</sub> (5 g), P<sub>2</sub>O<sub>5</sub> (5 g) with continuous stirring at 80 °C. The resulting mixture was kept at 80 °C for 4.5 h in oil bath, then DI water (~1 L) was added to the resulting mixture and left overnight. Pretreated graphite was thoroughly washed with water by filtration to remove all soluble substances and then dried in the oven at 60 °C. Pretreated graphite was added into 1000 ml beaker containing concentrated H<sub>2</sub>SO<sub>4</sub> (230 ml) in ice bath. KMnO<sub>4</sub> (30 g) was added slowly to dissolve completely. The resulting mixture was allowed to react at 35 °C for hours, and then 460 ml DI water was slowly added. In the process of adding water, the temperature of the mixture was remained constant. Another 1.4 L DI water was added to the mixed solution with continuous stirring at room temperature for 2 h. afterward, 25 ml of 30% H<sub>2</sub>O<sub>2</sub> was added to the mixture with continuous stirring at room temperature. The color of the mixed solution becomes golden yellow. The resulting mixture was stand for about 12 h and then the supernatant was decanted. The graphite oxide was thoroughly washed with 5% HCl solution and then DI water to remove all soluble substances. 8 mg·ml<sup>-1</sup> graphite oxide was sonicated for 30 min using an ultrasonic generator at an output

power of 600 W. The graphene oxide solution was centrifuged at 10000 g for 5 min to remove the unexfoliated graphite oxide. The inorganic ions in graphene oxide suspension were removed by dialysis.

### **Preparation of cellulose nanofibers/graphene nanohybrid aerogels**

A variety of graphene oxide dispersions (13 mg/ml) were added to a quantitative amount of cellulose nanofibers (1.5 mg/ml) aqueous solution under continuous magnetic stirring at room temperature to yield a homogeneous dispersion (pH8.5). Then homogeneous dispersion (pH 8.5) was mixed with 0.19 g VC-Na. The mixture was stirred for about 3 minutes to mix them well. The resulting mixture was poured into mould, and then exposure to the hydrochloric acid vapor for 2 h to get well formed CNFs/RGO nanohybrid hydrogel.

CNFs/RGO nanohybrid hydrogel was thoroughly rinsed in distilled water to remove inorganic ions, the hydrolysis product of VC-Na. the resulting hydrogel was further turned into the alcogel by using alcohol to replace the water within the network of the hydrogel, and then dried with supercritical CO<sub>2</sub> to obtain CNFs/RGO aerogel.

### **Preparation of the flexible supercapacitors**

6 g of H<sub>2</sub>SO<sub>4</sub> was added into 60 ml of deionized water, and then 6 g of PVA was added with continuous stirring at 80 °C until the solution became clear. Two pieces of CNFs/RGO (20%) aerogel were compressed into aerogel sheets under a pressure of 0.1 MPa, then two pieces of aerogel sheet (the edge of one side glued to the aluminum foil with silver paste, about 10 mm×20 mm) were soaked in the H<sub>2</sub>SO<sub>4</sub>-polyvinyl (PVA) gel electrolyte for 15 min and picked out. after that, two electrode sheets were left in the fume hood at room temperature for about 4 h to vaporize the excess water, then the two electrode sheets were assembled into all-solid-state flexible supercapacitors under a pressure of 0.2 MPa.

### **Electrochemical characterization**

The electrochemical performances of all-solid-state flexible supercapacitors were tested by cyclic voltammetry (CV), galvanostatic charge/discharge, and electrochemical impedance spectroscopy (EIS, on a CHI 660D, CH Instruments, Inc).

All the electrochemical characters of supercapacitors are calculated as follows,

The gravimetric capacitance:

$$C_g = 4(\int idV)/(v \times m \times V) \quad \text{or} \quad C_g = 4I \times \Delta t / (\Delta V \times m)$$

The area capacitance:

$$C_s = (\int idV)/(v \times S \times V)$$

The specific capacitance of supercapacitor devices:

$$C_{spe} = I \times \Delta t / (\Delta V \times m)$$

$$E = (1/2) C_{spe} \times V_{IR}^2$$

$$P = V_{IR}^2 / (4m \times R_{ESR})$$

Where  $I$  is the applied current,  $\Delta t$  is the discharged time,  $\Delta V$  is the discharged potential,  $m$  is the total mass of two symmetrical electrodes,  $V_{IR}$  is voltage after IR drop,  $v$  is the voltage scan rate,  $V$  is the cell voltage, and  $S$  is the area of the supercapacitor.

#### Characterization of cellulose nanofibers

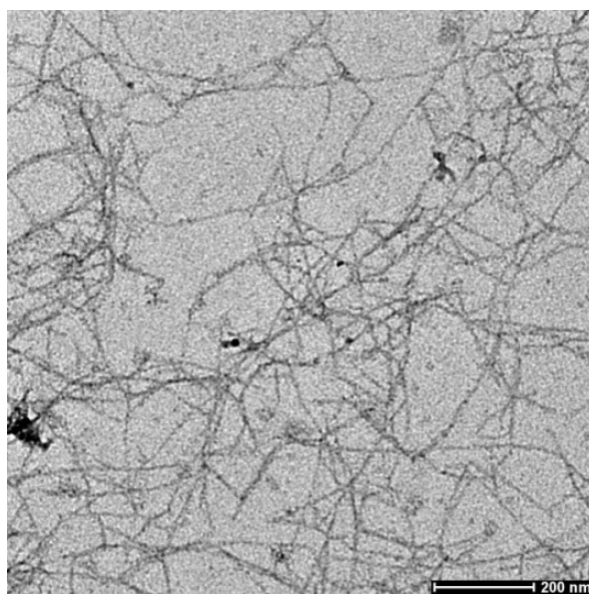

Fig.S1 TEM image of cellulose nanofiber samples

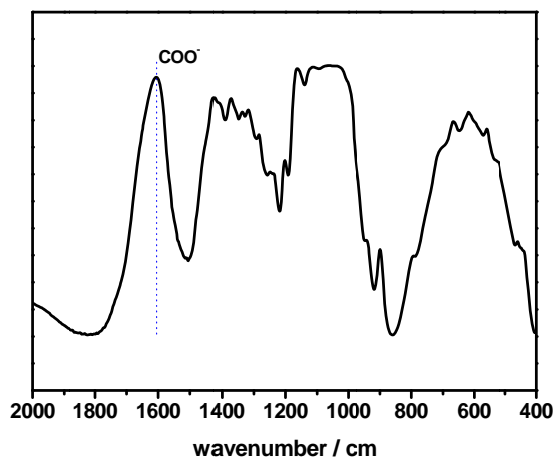

Fig.S2 FT-IR spectra of cellulose nanofiber samples

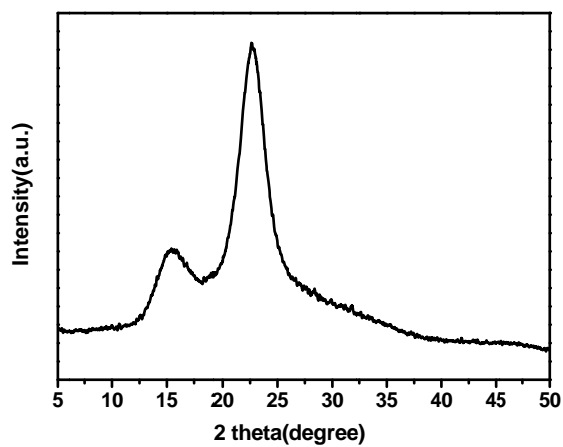

Fig.S3 XRD spectra of cellulose nanofiber samples

### Characterization of GO

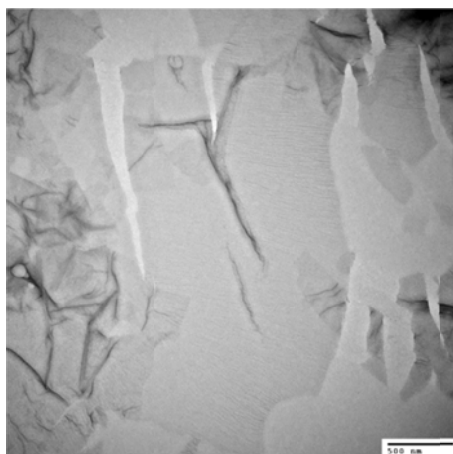

Fig.S4 TEM image of GO

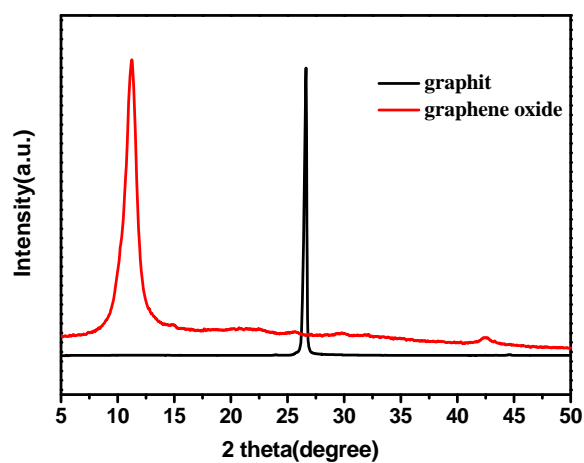

Fig.S5 XRD spectra of GO

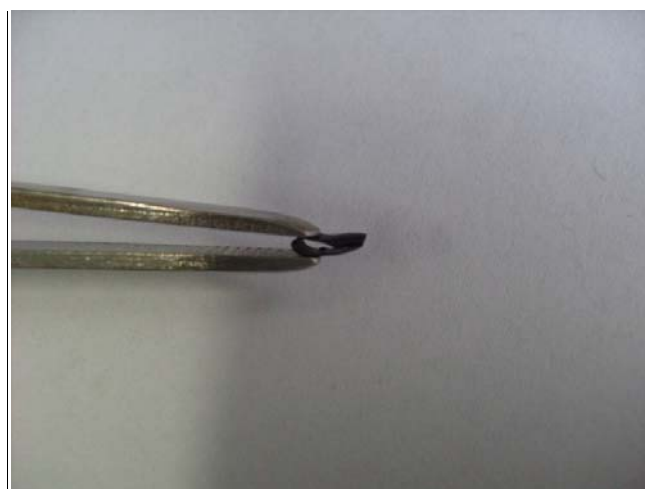

Fig.S6 Demonstration of the flexibility of CNFs/RGO (20%) aerogel film

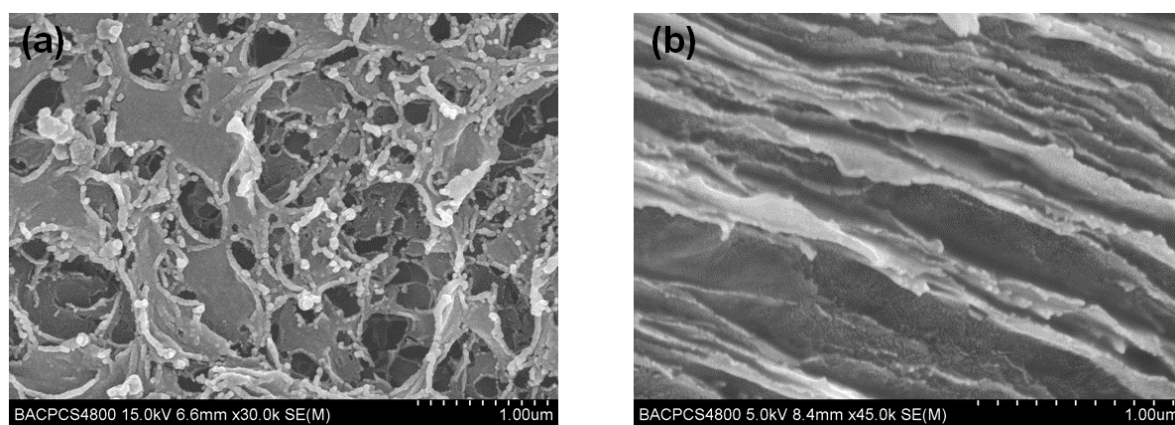

Fig.S7 (a) SEM image of RGO/CNFs (20%) hybrid aerogel film, (b) cross-section SEM image RGO/CNFs (20%) hybrid film

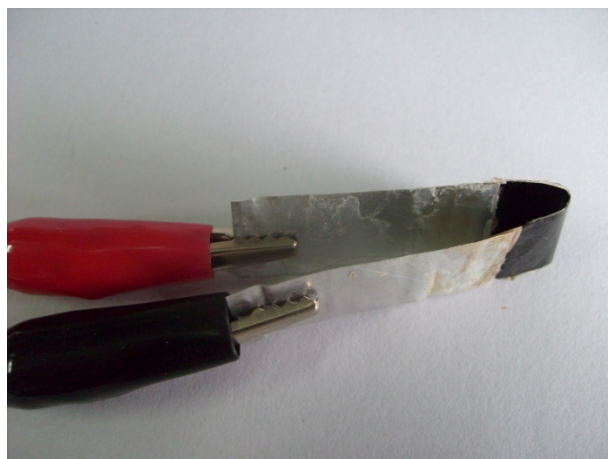

Fig.S8 Photograph of A-SCs

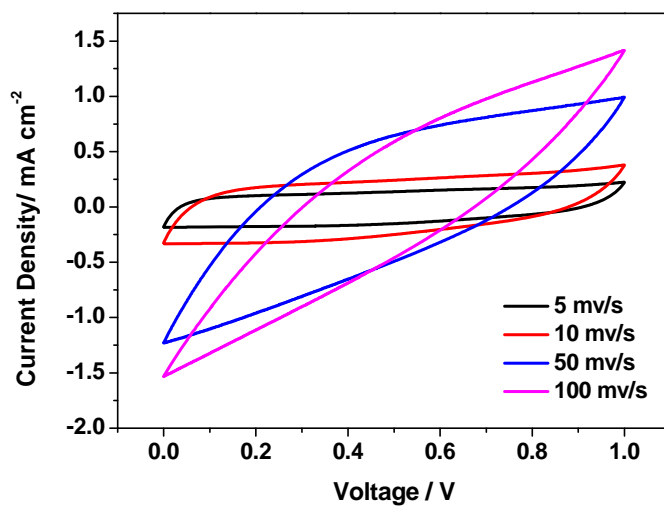

Fig.S9 CV curves for F-SCs

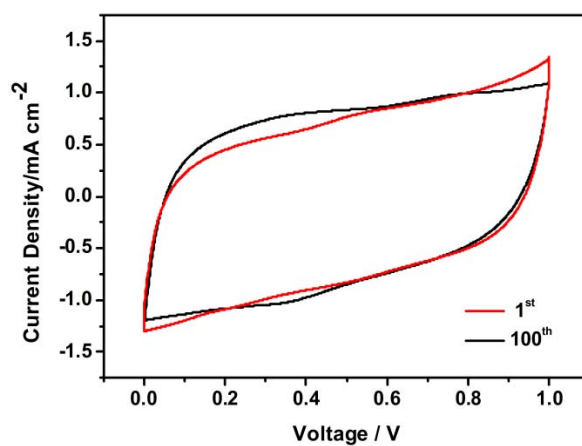

Fig.S10 CV curves measured before and after 100 bending cycles at 10 mV s<sup>-1</sup>

**Table S1.** The specific electrode capacitance of some flexible or thin-film supercapacitors

| Materials        | specific capacitance ( $\text{F g}^{-1}$ ) | Source                         |
|------------------|--------------------------------------------|--------------------------------|
| CNFS/RGO aerogel | 207                                        | Our work                       |
| RGO aerogel film | 172                                        | Adv. Mater, 2012 [S1]          |
| RGO              | 215                                        | Adv. Mater, 2011 [S2]          |
| GO               | 189                                        | Energy Environ. Sci, 2011 [S3] |
| CNPs/RGO         | 198                                        | Energy Environ. Sci, 2011 [S4] |
| RGO/cellulose    | 120                                        | Adv. Energy Mater, 2011 [S5]   |
| RGO aerogel      | 128                                        | J. Mater. Chem, 2011 [S6]      |

**Table S2.** The Capacitance per geometric area of some flexible or thin-film supercapacitors

| Materials            | Area capacitance ( $\text{mF cm}^{-2}$ ) | Source                         |
|----------------------|------------------------------------------|--------------------------------|
| CNFS/RGO aerogel     | 158                                      | Our work                       |
| GCP                  | 81                                       | Adv. Energy Mater, 2011 [S5]   |
| RMGO                 | 0.39                                     | Nano Lett, 2011 [S7]           |
| Graphite             | 2.3                                      | Energy Environ. Sci, 2011 [S3] |
| CNPs/ $\text{MnO}_2$ | 109                                      | ACS NANO, 2012 [S4]            |
| BNC/CNT              | 18.8                                     | ACS NANO, 2012 [S5]            |
| SWCNT/cotton         | 34                                       | Nano Res, 2010 [S6]            |
| SWCNT/PET            | 26                                       | Nano Res, 2010 [S7]            |
| RGO                  | 45.6                                     | Adv.Mater, 2012 [S8]           |

S1 F. Liu, S. Song, D. Xue and H. Zhang, *Adv. Mater.* 2012, **24**, 1089-1094.

S2 X. Yang, J. Zhu, L. Qiu and D. Li, *Adv. Mater.*, 2011, **23**, 2833-2838.

S3 B. Xu, S. Yue, Z. Sui, X. Zhang, S. Hou, G. Cao and Y. Yang, *Energy & Environmental Science*, 2011, **4**, 2826-2830.

S4 C. X. Guo and C. M. Li, *Energy & Environmental Science*, 2011, **4**, 4504-4507.

- S5 Z. Weng, Y. Su, D.-W. Wang, F. Li, J. Du and H.-M. Cheng, *Advanced Energy Materials*, 2011, **1**, 917-922.
- S6 X. Zhang, Z. Sui, B. Xu, S. Yue, Y. Luo, W. Zhan and B. Liu, *Journal of Materials Chemistry*, 2011, **21**, 6494-6497.
- S7 J. J. Yoo, K. Balakrishnan, J. Huang, V. Meunier, B. G. Sumpter, A. Srivastava, M. Conway, A. L. M. Reddy, J. Yu, R. Vajtai and P. M. Ajayan, *Nano Letters*, 2011, **11**, 1423-1427.
- S8 G. Zheng, L. Hu, H. Wu, X. Xie and Y. Cui, *Energy & Environmental Science*, 2011, **4**, 3368-3373.
- S9 L. Yuan, X.-H. Lu, X. Xiao, T. Zhai, J. Dai, F. Zhang, B. Hu, X. Wang, L. Gong, J. Chen, C. Hu, Y. Tong, J. Zhou and Z. L. Wang, *ACS nano*, 2012, **6**, 656-661.
- S10 Y. J. Kang, S.-J. Chun, S.-S. Lee, B.-Y. Kim, J. H. Kim, H. Chung, S.-Y. Lee and W. Kim, *ACS nano*, 2012, **6**, 6400-6406.
- S11 M. Pasta, F. La Mantia, L. B. Hu, H. D. Deshazer, Y. Cui, *Nano Res.* 2010, **3**, 452.
- S12 P. C. Chen, H. T. Chen, J. Qiu, C. W. Zhou, *Nano Res.* 2010, **3**, 594.
- S13 J. Chen, K. Sheng, P. Luo, C. Li and G. Shi, *Adv. Mater.* 2012, **24**, 4569-4573.
